# Supplementary material
Source: publisher figshare collection journal article supplement (https://tandf.figshare.com/articles/dataset/_/4924355)
Supplement: Supplementary file 1 [file 2]

|                         |                                               |                              |                                                    | Ovulate cone               |             |                 |                    | Cone scale        |                       |                                    |                             | Seed          |             |             |             |
|-------------------------|-----------------------------------------------|------------------------------|----------------------------------------------------|----------------------------|-------------|-----------------|--------------------|-------------------|-----------------------|------------------------------------|-----------------------------|---------------|-------------|-------------|-------------|
| Character species group | Character species                             | Geographic range             | Geochronologic range                               | Shape                      | Length (mm) | Max. diam. (mm) | Axial resin canals | Arrangement       | Total number per cone | Form                               | Vascular tissue in head     | No. per scale | No. of rows | Orientation | Wing(s)     |
| <i>Austrosequoia</i>    | <i>Austrosequoia novae-zeelandiae</i>         | Chatham Islands; New Zealand | Late Cretaceous (Cenomanian; ?Santonian–Campanian) | Globose/ellipsoidal        | 9–19        | 8–23            | +                  | Helical           | 19–24                 | Peltate with distal groove & ridge | ?                           | ?             | 1           | ?           | Absent      |
|                         | <i>Austrosequoia wintonensis</i> (1)          | Queensland, Australia        | Cretaceous (?Albian–Turonian)                      | Ellipsoidal                | 9–16        | 6–11            | —                  | Helical           | 29–49                 | Peltate with distal groove         | 2 bundles                   | 4–7           | 1           | Inverted    | ?           |
| Sequoioid (extinct)     | <i>Drumhelleria kurmanniae</i> (2)            | Alberta, Canada              | Late Cretaceous (Campanian)                        | Ellipsoidal                | 20–30       | 17–23           | +                  | Helical           | ≤ 27                  | Peltate                            | Flattened oval ring         | ≤ 13          | 2           | Inverted    | Wide        |
|                         | <i>Haborosequoia nakajimae</i> (3)            | Hokkaido, Japan              | Late Cretaceous (Santonian)                        | Ovoid                      | ?           | 24              | +                  | Helical           | > 15                  | Peltate                            | Flattened oval ring         | ?             | ?           | Inverted?   | ?           |
|                         | ( <i>Sequoia</i> -like) Hokkaido cone (3)     | Hokkaido, Japan              | Late Cretaceous (Santonian)                        | Ellipsoidal                | 22          | 17              | —                  | Helical           | > 15                  | Peltate with distal groove         | Reniform ring               | ?             | ?           | ?           | ?           |
|                         | <i>Metasequoia foxii</i> (4)                  | Alberta, Canada              | Paleocene                                          | Globose/cylindrical/ ovoid | 10–35       | 22              | ?                  | Decussate/helical | > 15                  | Peltate with distal groove         | ?                           | ?             | ?           | ?           | Wide        |
|                         | <i>Metasequoia millerii</i> (5)               | British Columbia, Canada     | Eocene                                             | Subglobose/cylindrical     | ~ 25        | ~ 17            | +                  | Decussate         | ≤ 30                  | Peltate with distal groove         | Flattened oval ring         | 4+            | 1           | Inverted    | Wide        |
|                         | <i>Metasequoia occidentalis</i> (6,7)         | North America                | Paleocene–Miocene                                  | Globose/ ovoid             | 11–40       | 34              | ?                  | Decussate         | > 15                  | Peltate with distal groove         | ?                           | ?             | ?           | ?           | Wide        |
|                         | <i>Nephroostrobus bifurcatus</i> (8)          | New Jersey, U.S.A.           | Late Cretaceous (Santonian–Campanian)              | Ellipsoidal                | > 50        | 15              | +                  | Helical           | > 40                  | Peltate                            | Flattened oval ring         | ?             | ?           | ?           | ?           |
|                         | <i>Nephroostrobus cliffwoodensis</i> (8)      | New Jersey, U.S.A.           | Late Cretaceous (Santonian–Campanian)              | Ellipsoidal                | > 15        | 14              | +                  | Helical           | > 20                  | Peltate                            | Reniform ring               | ?             | ?           | ?           | ?           |
|                         | <i>Parataxodium wigginsii</i> (9)             | Northern Alaska, U.S.A.      | Late Cretaceous (Campanian–Maastrichtian) (17)     | Ellipsoidal                | ~ 13        | ~ 10            | ?                  | ?                 | 20–30?                | Peltate                            | ?                           | ?             | ?           | ?           | ?           |
|                         | <i>Stockeystrobus interdigitata</i> (10)      | Hokkaido, Japan              | Late Cretaceous (Coniacian–Santonian)              | Cylindrical                | > 42        | 24              | —                  | Helical           | > 40                  | Peltate                            | Adaxial row + abaxial ring  | 6–8           | 1           | Inverted    | Wide        |
|                         | <i>Yezosequoia shimanukii</i> (11)            | Hokkaido, Japan              | Late Cretaceous (Turonian–Santonian)               | Ellipsoidal                | 22–25       | 25–29           | +                  | Helical           | ~ 35                  | Peltate with apical spine          | Flattened oval ring         | 4             | 1           | Inverted    | Narrow      |
| Sequoioid (extant)      | <i>Yubaristrobus nakajimae</i> (12)           | Hokkaido, Japan              | Late Cretaceous (Coniacian–Santonian)              | Ellipsoidal                | 45          | 26              | +                  | Helical           | 25+                   | Peltate with distal groove         | Oval ring + intern. bundles | 3–4           | 1           | Erect       | Narrow      |
|                         | <i>Metasequoia glyptostroboides</i> (5,13,14) | Central China                | Recent                                             | Ellipsoidal                | 15–30       | 15–18           | —                  | Decussate         | 18–25                 | Peltate with distal groove         | Reniform ring               | 6–8           | 1           | Inverted    | Narrow-wide |
|                         | <i>Sequoia sempervirens</i> (13,15)           | Western U.S.A.               | Recent                                             | Ellipsoidal                | 15–30       | 15–18           | —                  | Helical           | 18–25                 | Peltate with distal groove         | Reniform ring               | 6–8           | 1           | Inverted    | Narrow      |
|                         | <i>Sequoiadendron giganteum</i> (13,15)       | Western U.S.A.               | Recent                                             | Ellipsoidal                | 30–95       | 25–65           | —                  | Helical           | 28–45                 | Peltate with distal groove & ridge | Flattened oval ring         | 8–10          | 2           | Inverted    | Wide        |
| Athrotaxidoid           | <i>Athrotaxis cupressoides</i> (1,16)         | Tasmania, Australia          | Recent                                             | Globose                    | 12–15       | 12–15           | ?                  | Helical           | 12–25                 | Rhomboidal with apical spine       | 2 bundles                   | 3–6           | 1           | Inverted    | Wide        |

Comparison chart of morphological and anatomical characters of living and extinct athrotaxidoid and sequoioid Cupressaceae seed cones. Characters shared by *Austrosequoia novae-zeelandiae* and other taxa are shaded grey; for quantitative characters, shared characters are those with ranges which overlap with *A. novae-zeelandiae*. Note: this table is not exhaustive, as the sequoioid taxa have been limited to those with enough recorded morphological details for designation to Sequoioidae. *Austrosequoia tasmanica* Hill *et al.*, 1993, was not included here because the associated ovulate cone material was not included in the diagnosis. (1) Peters & Christophel 1978; (2) Serbet 1997; (3) Ohsawa *et al.* 1992; (4) Stockey *et al.* 2001; (5) Basinger 1984; (6) Newberry 1863; (7) Chaney 1950; (8) LaPasha & Miller 1981; (9) Arnold & Lowther 1955; (10) Rothwell & Ohana 2016; (11) Nishida *et al.* 1991; (12) Ohsawa *et al.* 1993; (13) Lemoine-Sebastian 1968; (14) Hollick & Jeffrey 1909; (15) Hirmer 1936; (16) Hill *et al.* 1993; (17) Phillips 2003. Table updated from Rothwell & Ohana (2016).
